# Supplementary material
Source: HighWire-hosted journal article supplement (https://www.cmaj.ca/highwire/filestream/74247/field_highwire_adjunct_files/1/191402-res-2-at.pdf)
Supplement: 191402-res-2-at.pdf [file 191402-res-2-at.pdf]

|                       |                                                                                                                                                                                                                                                                                                                                                                                                                                                                                                  |                                                                                                                                                                                                                                                                                                                                                           |                                                                                                                                                                                                                                                                                                                                 |                                                                                                                                                                                                                    |                                                                                                                                                                                                                       |                                                                                                                                                                                                                                                                                                                                                                                                                                                                                                                                                                                                                                               |                                                                                                                                                                                                                                                                                                                                                                                                                                                                                                                                                                                              |                                                                                                                                                                                                                                                                                                                                                                                                                                                                                             |                                                                                                                                                                          |                                                                                                                                                                                                                                                            |                                                                                                                                                                                                                                                                                                                                                                                                                                      |                                         |                                                                                                                                               |                                                |
|-----------------------|--------------------------------------------------------------------------------------------------------------------------------------------------------------------------------------------------------------------------------------------------------------------------------------------------------------------------------------------------------------------------------------------------------------------------------------------------------------------------------------------------|-----------------------------------------------------------------------------------------------------------------------------------------------------------------------------------------------------------------------------------------------------------------------------------------------------------------------------------------------------------|---------------------------------------------------------------------------------------------------------------------------------------------------------------------------------------------------------------------------------------------------------------------------------------------------------------------------------|--------------------------------------------------------------------------------------------------------------------------------------------------------------------------------------------------------------------|-----------------------------------------------------------------------------------------------------------------------------------------------------------------------------------------------------------------------|-----------------------------------------------------------------------------------------------------------------------------------------------------------------------------------------------------------------------------------------------------------------------------------------------------------------------------------------------------------------------------------------------------------------------------------------------------------------------------------------------------------------------------------------------------------------------------------------------------------------------------------------------|----------------------------------------------------------------------------------------------------------------------------------------------------------------------------------------------------------------------------------------------------------------------------------------------------------------------------------------------------------------------------------------------------------------------------------------------------------------------------------------------------------------------------------------------------------------------------------------------|---------------------------------------------------------------------------------------------------------------------------------------------------------------------------------------------------------------------------------------------------------------------------------------------------------------------------------------------------------------------------------------------------------------------------------------------------------------------------------------------|--------------------------------------------------------------------------------------------------------------------------------------------------------------------------|------------------------------------------------------------------------------------------------------------------------------------------------------------------------------------------------------------------------------------------------------------|--------------------------------------------------------------------------------------------------------------------------------------------------------------------------------------------------------------------------------------------------------------------------------------------------------------------------------------------------------------------------------------------------------------------------------------|-----------------------------------------|-----------------------------------------------------------------------------------------------------------------------------------------------|------------------------------------------------|
| 17                    | is in the E.N.D.S.7<br>Haddad J, Carpenter D, Kopeck S<br>Chest. Conference: CHEST 2016.<br>United States. 102 (4 Supplement 1)<br>(pp S624). 2016. Date of Publication:<br>October 2016.<br>AN: 61368522                                                                                                                                                                                                                                                                                        | 35 year old female at 32.6<br>weeks gestation                                                                                                                                                                                                                                                                                                             | intermittent over the last month, but heavy<br>weeks prior to presentation. <b>BELF-<br/>MIXING VAPE CARTRIDGES WITH<br/>glycerol, vegetable oil and strawberry<br/>flavoring.</b>                                                                                                                                              | afebrile, but in respiratory<br>distress                                                                                                                                                                           | lipid pneumonia                                                                                                                                                                                                       | Computed tomography (CT)<br>angiography of the thorax with<br>contrast showed upper lobe predominant<br>ground glass opacities and<br>"crazy paving"                                                                                                                                                                                                                                                                                                                                                                                                                                                                                          | WBC 19,300                                                                                                                                                                                                                                                                                                                                                                                                                                                                                                                                                                                   | Vaginal delivery                                                                                                                                                                                                                                                                                                                                                                                                                                                                            | Discharged day 5                                                                                                                                                         | none                                                                                                                                                                                                                                                       | High-flow nasal<br>cannula. Vaginal<br>delivery of 32 weeks<br>gestation.                                                                                                                                                                                                                                                                                                                                                            | Case report -<br>conference<br>abstract | Medium - Poor<br>quality paper<br>assumes lipid<br>pneumonia without<br>bronch diagnosis.<br>May have been<br>Pneumonia from<br>pre-eclampsia |                                                |
| 18                    | Chronic idiopathic neutrophilia in a<br>smoker, resolved after smoking<br>cessation with the use of <b>electronic<br/>cigarettes</b> . A case report.<br>Farsalinas K.E., Romagna G<br>Clinical Medicine Insights: Case<br>Reports. 6 (pp 15-21). 2013. Date of<br>Publication: 2013.<br>AN: 38045346                                                                                                                                                                                            | male Caucasian patient<br>born in 1977, presented<br>in September 2005. 19<br>pack-year smoker.                                                                                                                                                                                                                                                           | Used as a quitting agent. Not implicated in<br>disease here.                                                                                                                                                                                                                                                                    | asymptomatic elevation of white<br>blood cell and neutrophil count,<br>and mildly elevated C-reactive<br>protein levels.                                                                                           | Chronic idiopathic neutrophilia                                                                                                                                                                                       | laboratory and imaging<br>investigations ruled out any<br>infectious, hematological,<br>rheumatological, or endocrine<br>causes.                                                                                                                                                                                                                                                                                                                                                                                                                                                                                                              | Resolution of leukocyte count<br>and CRP with smoking<br>cessation (used vaping to quit)                                                                                                                                                                                                                                                                                                                                                                                                                                                                                                     | 6.5 years                                                                                                                                                                                                                                                                                                                                                                                                                                                                                   | none                                                                                                                                                                     | 0 increased<br>monitoring                                                                                                                                                                                                                                  | Case report                                                                                                                                                                                                                                                                                                                                                                                                                          | Medium                                  |                                                                                                                                               |                                                |
| 19                    | Acute eosinophilic pneumonia<br>following <b>electronic cigarette</b> use.<br>Aher ZL, Wiggins A., Hodgson C,<br>Kling A., Hoeller D.C., Hoeller J.M.<br>Respiratory Medicine Case Reports.<br>27 (pp 171-173). 2019. Date of<br>Publication: 2019. Article Number:<br>100825. Date of Publication:<br>2019.<br>AN: 200172837                                                                                                                                                                    | previously healthy 18-<br>year-old female. Non-<br>smoker.                                                                                                                                                                                                                                                                                                | "Baby Smok Beast Mod device" with 6%<br>nicotine fluid 5 times per day for 30<br>minutes. Started two months prior to<br>presentation.                                                                                                                                                                                          | presented to the Emergency<br>Room after one day of fever,<br>nonproductive cough, difficulty<br>breathing, and pleuritic chest<br>pain.                                                                           | acute eosinophilic pneumonia                                                                                                                                                                                          | Inflated acute hyperinflated<br>right lower lung airspace<br>consolidation consistent with a<br>pneumonia. The CTPA<br>excluded PE, but found diff<br>use ground-glass opacity<br>air-space disease and<br>coalescing nodules                                                                                                                                                                                                                                                                                                                                                                                                                 | bronchial alveolar lavage<br>(BAL) was performed, revealing<br>20% eosinophils in the lavage<br>fluid.                                                                                                                                                                                                                                                                                                                                                                                                                                                                                       | IV Azithromycin, no<br>effect. methyl-<br>prednisolone 125mg<br>intravenous every 6<br>hours. After two<br>days she<br>showed significant<br>improvement and<br>was switched to<br>prednisone 60mg.<br>Taper dose after 6<br>days.                                                                                                                                                                                                                                                          | 0 increased<br>monitoring                                                                                                                                                | Case report                                                                                                                                                                                                                                                | Medium                                                                                                                                                                                                                                                                                                                                                                                                                               |                                         |                                                                                                                                               |                                                |
| 20                    | Lung injury from inhaling butane hash<br>oil (BHO) pneumonia.<br>Anderson R.P., Zecher K.<br>Respiratory Medicine Case Reports.<br>26 (pp 171-173). 2019. Date of<br>Publication: 2019.<br>AN: 2001443419                                                                                                                                                                                                                                                                                        | Previously healthy 18F.<br>One pack per day                                                                                                                                                                                                                                                                                                               | Did not use. Daily dabbing                                                                                                                                                                                                                                                                                                      | SOB, hypoxic. Diffuse<br>respiratory wheezes on exam with<br>bilateral rhonchi                                                                                                                                     | "severe pneumonitis" presumed<br>No bronch or biopsy                                                                                                                                                                  | Butane hash oil (BHO) dabbed<br>chest x-ray was positive for<br>bilateral patchy infiltrates with<br>mild hyperinflation. CT was<br>negative for pulmonary embolus<br>or other acute pathologic<br>process, but showed bilateral<br>patchy infiltrates                                                                                                                                                                                                                                                                                                                                                                                        | three breathing<br>treatments, IV steroids                                                                                                                                                                                                                                                                                                                                                                                                                                                                                                                                                   | unknown. Presumed<br>discharge?                                                                                                                                                                                                                                                                                                                                                                                                                                                             | unknown                                                                                                                                                                  | Case report                                                                                                                                                                                                                                                | Low - dabbing                                                                                                                                                                                                                                                                                                                                                                                                                        |                                         |                                                                                                                                               |                                                |
| 21                    | Lung injury associated with <b>electronic<br/>cigarettes</b> inhalation diagnosed by<br>transbronchial lung biopsy.<br>Nakamura K., Hara Y.,<br>Nakamura T., Takemura T.<br>Respiratory Medicine Case Reports.<br>6 (1) (no<br>page number). 2018. Article Number:<br>100282. Date of Publication: January<br>2018.<br>AN: 619949375                                                                                                                                                             | 46-year-old healthy man,<br>20 pack-year smoker quit<br>3 months prior to<br>presentation.                                                                                                                                                                                                                                                                | Used for one month prior to symptoms                                                                                                                                                                                                                                                                                            | respiratory distress, night<br>sweats, fever, and weight loss                                                                                                                                                      | Listed as "acute alveolitis with<br>intra-alveolar fibrosis caused by a<br>cig use. We diagnosed<br>a cigarette-induced ALI caused by<br>inhalation."                                                                 | Chest radiography revealed<br>apical opacities in the bilateral upper<br>lung fields with extensive<br>bilateral ground glass opacity<br>(GGO) predominantly around the<br>lateral segments of the lung<br>(Fig. 1A). Chest computed<br>tomography (CT) revealed<br>GGO and traction<br>bronchiectasis throughout the<br>entire bilateral upper lobes,<br>non-segmental GGO with<br>candlestick shadow was also<br>observed in the middle lobe.                                                                                                                                                                                               | transbronchial lung biopsy<br>examination led to the diagnosis of<br>acute alveolitis, intra-alveolar fibrosis<br>accompanied with exuberant<br>abundant lipoid-laden<br>macrophages, eosinophils, and<br>neutrophils.                                                                                                                                                                                                                                                                                                                                                                       | methyprednisolone<br>pulse therap                                                                                                                                                                                                                                                                                                                                                                                                                                                           | Rapid resolution of symptoms                                                                                                                                             | none                                                                                                                                                                                                                                                       | Case Report                                                                                                                                                                                                                                                                                                                                                                                                                          | Medium                                  |                                                                                                                                               |                                                |
| 22                    | Good, bad, and ugly on <b>vaping</b> .<br><a href="https://www.ajronline.org/article.ajr?iid=309124">https://www.ajronline.org/article.ajr?iid=309124</a><br>Narang R, Narang D, Narang S,<br>Salmari J, Gayen N, Ullman G.<br>Chest. Conference: CHEST 2015.<br>Montreal, QC Canada. Conference<br>Publication (see pagings). 148 (4<br>MEETING ABSTRACT) (no<br>page number). 2015. Date of Publication:<br>October 2015.<br>AN: 7212048                                                       | 23-year-old morbidly<br>obese male patient with<br>no significant past<br>medical history                                                                                                                                                                                                                                                                 | Vaping for last 6 months.                                                                                                                                                                                                                                                                                                       | Emergency Department with<br>worsening productive cough<br>with red sputum and<br>shortness of breath. Febrile.<br>Tachypnea.                                                                                      | Hypersensitivity Pneumonitis                                                                                                                                                                                          | BALF cultures were negative.<br>BAL cell count and differential<br>showed 80% lymphocytes.                                                                                                                                                                                                                                                                                                                                                                                                                                                                                                                                                    | Transbronchial biopsy of the left<br>and right lungs exhibited noncaseating<br>epithelioid granulomas.                                                                                                                                                                                                                                                                                                                                                                                                                                                                                       | Normal WBC and LFTs. Tuberculin<br>skin test, fungal serologies,<br>cytomegalovirus, toxoplasma,<br>and HIV were all<br>negative. ACE level was normal                                                                                                                                                                                                                                                                                                                                      | rapidly with cessation<br>of <b>e-cigarette</b> usage<br>and steroid treatment                                                                                           | Improved rapidly with<br>cessation of <b>e-cigarette</b> usage<br>and steroid treatment.<br>Discharged home.                                                                                                                                               | none                                                                                                                                                                                                                                                                                                                                                                                                                                 | Case report -<br>conference<br>abstract | High                                                                                                                                          |                                                |
| 23                    | Acute lipid pneumonia secondary to<br><b>e-cigarette</b> use. An unlikely<br>replacement for cigarette.<br>Mori S., Sengari R., Aiyama A.<br>Chest. Conference: CHEST 2015.<br>Montreal, QC Canada. Conference<br>Publication (see pagings). 148 (4<br>MEETING ABSTRACT) (no<br>page number). 2015. Date of Publication:<br>October 2015.<br>AN: 7212048                                                                                                                                         | 31-year-old female<br>smoker was                                                                                                                                                                                                                                                                                                                          | Recent three month <b>e-cigarette</b> use                                                                                                                                                                                                                                                                                       | admitted to the hospital for<br>progressive dyspnea and cough                                                                                                                                                      | Lipid pneumonia                                                                                                                                                                                                       | Chest x-ray noted bilateral<br>air space opacities. CT of the chest<br>(Fig. 1) revealed diffuse ground<br>glass opacities with interlobular<br>septal thickening consistent with<br>"crazy paving" pattern.                                                                                                                                                                                                                                                                                                                                                                                                                                  | bronchoalveolar lavage (Fig 2)<br>showed reactive pneumocytes<br>and alveolar macrophages with<br>granular opacities with interlobular<br>septal thickening consistent with<br>lipid content                                                                                                                                                                                                                                                                                                                                                                                                 | Blood and sputum cultures were<br>negative.                                                                                                                                                                                                                                                                                                                                                                                                                                                 | Empiric abs, but<br>worsened to ARDS.<br>Required IV steroids                                                                                                            | patient noted rapid<br>improvement with cessation of<br><b>e-cigarettes</b> and systemic<br>steroids                                                                                                                                                       | in-hospital                                                                                                                                                                                                                                                                                                                                                                                                                          | Case report -<br>conference<br>abstract | High                                                                                                                                          |                                                |
| 24                    | "A little dab will do ya": An emergency<br>department case series related to a<br>new form of "high potency" marijuana<br>known as "wax".<br>Schwartz T, Sterling G.P.,<br>Valenzuela R, Mallon W.K.<br>Annals of Emergency Medicine.<br>Conference: American College of<br>Emergency Physicians, ACEP 2014<br>Research Forum, Chicago, IL, United<br>States. Conference Publication.<br>(see pagings). 64 (4 SUPPL. 1) (pp<br>S139). 2014. Date of Publication:<br>October 2014.<br>AN: 7166310 | 4 Young patients through<br>the ED. One psychosis, 3<br>burns from dabbing,<br>explosions in preparation<br>of butane hash oil                                                                                                                                                                                                                            | DID NOT VAPE                                                                                                                                                                                                                                                                                                                    |                                                                                                                                                                                                                    |                                                                                                                                                                                                                       |                                                                                                                                                                                                                                                                                                                                                                                                                                                                                                                                                                                                                                               |                                                                                                                                                                                                                                                                                                                                                                                                                                                                                                                                                                                              |                                                                                                                                                                                                                                                                                                                                                                                                                                                                                             |                                                                                                                                                                          |                                                                                                                                                                                                                                                            |                                                                                                                                                                                                                                                                                                                                                                                                                                      | Case series                             | Low - dabbing                                                                                                                                 |                                                |
| END OF EMBASE RESULTS |                                                                                                                                                                                                                                                                                                                                                                                                                                                                                                  |                                                                                                                                                                                                                                                                                                                                                           |                                                                                                                                                                                                                                                                                                                                 |                                                                                                                                                                                                                    |                                                                                                                                                                                                                       |                                                                                                                                                                                                                                                                                                                                                                                                                                                                                                                                                                                                                                               |                                                                                                                                                                                                                                                                                                                                                                                                                                                                                                                                                                                              |                                                                                                                                                                                                                                                                                                                                                                                                                                                                                             |                                                                                                                                                                          |                                                                                                                                                                                                                                                            |                                                                                                                                                                                                                                                                                                                                                                                                                                      |                                         |                                                                                                                                               |                                                |
| 25                    | Life-Threatening Vesicular Bronchial<br>Injury Requiring Video-Assisted<br>Thoracoscopic Resection in an Electronic<br>Cigarette Delivery System User.<br>Carter T, Tucker D, Kille A,<br>Pappalardo T, Barber A, Berry E.<br>Clinical Practice & Cases in<br>Emergency Medicine. 13(1):212-217,<br>2017 Aug.<br>(Case Report)<br>UI: 2948693                                                                                                                                                    | 35-year-old female. Ex-<br>smoker. medical history<br>included coronary artery<br>disease, uncontrolled<br>diabetes mellitus type 2,<br>obesity, deep vein<br>thrombosis, dyslipidemia,<br>gastroesophageal reflux,<br>headaches, and<br>hypertension. Her<br>surgical history was<br>significant for three-<br>vessel coronary artery<br>bypass grafting | only use of two refill containers she knew to<br>be 2.5% nicotine or 25mg/ml in nicotine<br>concentration, which she believed was equal<br>to a pack of cigarettes. The husband was<br>unable to identify the single refill product that<br>was the most recently used of the two, and the<br>patient had three different ENDS. | emergency department with<br>sudden-onset dyspnea, severe<br>pain in the back of her neck and<br>left arm, which worsened with<br>inhalation.                                                                      | Bronchial inhalation / burn injury<br>from vaping. But also had MFSA                                                                                                                                                  | no CT was performed with nodular<br>infiltrates centered in the lower<br>lung zones (Image 1) with some<br>suspected chemical injury was<br>noted in her airways.<br>bronchoscopy was performed<br>and demonstrated erythema of<br>the tracheal tissues extending to<br>an CT level two years prior and<br>a nodular thickening of the ribs.<br>The main bronchus had a yellow,<br>vesicular appearance with<br>interspersed erythema and<br>increased friability of the tissue.<br>The right mainstem bronchus<br>and remaining airways had a<br>rust-colored appearance along<br>with erythema extending into the<br>visible lower airways. | bronchoscopy was performed,<br>an extensive pattern of<br>suspected chemical injury was<br>noted in her airways.<br>bronchoscopy was performed<br>and demonstrated erythema of<br>the tracheal tissues extending to<br>an CT level two years prior and<br>a nodular thickening of the ribs.<br>The main bronchus had a yellow,<br>vesicular appearance with<br>interspersed erythema and<br>increased friability of the tissue.<br>The right mainstem bronchus<br>and remaining airways had a<br>rust-colored appearance along<br>with erythema extending into the<br>visible lower airways. | bronchial alveolar lavage culture<br>revealed heavy growth of<br>methicillin-<br>resistant <i>Staphylococcus<br/>aureus</i> (MRSA) 48 hours after<br>admission. Her urine culture was<br>positive for <i>Escherichia coli</i> .<br>she had a normal complete blood<br>count, procalcitonin, creatine<br>kinase, and troponin. A measured<br>glucose of 667 mg/dL with<br>pseudohyponatremia (128 mmol/L,<br>chloride of 96 mmol/L, and her D-<br>Dimer was noted to be slightly<br>elevated | metoprolol<br>metoprolol and<br>vincoronyl.                                                                                                                              | She was returned to the long-<br>term rehabilitation unit of the<br>initial treatment center. There<br>she progressed well, where<br>she was ambulating with an<br>assist device and made<br>significant progress toward an<br>independent return to home. | rapid. Then<br>inhalation for<br>hypoxic resp<br>failure. <b>VF-ECMO</b><br>required. She<br>improved on<br>ECMO, eventually<br>requiring a<br>tracheostomy,<br>which was<br>discontinued 14<br>days later.                                                                                                                                                                                                                          | Case Report                             | HIGH - ECMO                                                                                                                                   |                                                |
| 26                    | Vaping in the acute ECMO for<br>patients with status asthmaticus<br>after <b>vaping</b> .<br>Bradford L., Abdul M.E., Rong B.J.,<br>Jagers L., Clement K.C., Loughlin<br>C.E.<br>Journal of Asthma. (no page number).<br>2019. Date of Publication: 2019.<br>AN: 63886125                                                                                                                                                                                                                        | Case 1: 18-year-old male<br>with known history of<br>severe persistent asthma,<br>obesity, and allergic<br>rhinitis. Case 2: 54F<br>severe persistent asthma.                                                                                                                                                                                             | Vaping                                                                                                                                                                                                                                                                                                                          | Case 1: Acute deterioration.<br>Hypercapnic resp failure, status<br>asthmaticus. Vented during<br>intubation. VF-ECMO for 5<br>days. Case 2: status<br>asthmaticus. Required<br>intubation. VF-ECMO for 6<br>days. | Status Asthmaticus                                                                                                                                                                                                    | Flexible bronchoscopy yielded<br>bloody lavage fluid suspicious<br>for diffuse alveolar hemorrhage,<br>with 61% neutrophils, 8%<br>eosinophils, and 2%<br>lymphocytes. Flow cytometry of<br>the fluid showed a CD45CD8<br>ratio of 0.48                                                                                                                                                                                                                                                                                                                                                                                                       | Organizing pneumonia                                                                                                                                                                                                                                                                                                                                                                                                                                                                                                                                                                         | None, resolved without<br>steroids                                                                                                                                                                                                                                                                                                                                                                                                                                                          | Discharged home day 5.<br>steroids                                                                                                                                       | Two weeks later,<br>monitoring<br>increased of<br>ct findings.                                                                                                                                                                                             | intubation, VF<br>ECMO                                                                                                                                                                                                                                                                                                                                                                                                               | None                                    | Case Series -<br>two<br>patients                                                                                                              | Medium - ECMO<br>but severe asthma<br>patients |
| 27                    | Tree-in-Bloom? Severe Acute Lung<br>Injury Induced by <b>Vaping Cannabis</b> .<br>He T., Ota M., Esposto M., Steinberg H,<br>Mikami M.<br>Annals of the American Thoracic<br>Society. 14(3):468-470. 2017 Oct.<br>(Case Report, Letter)<br>UI: 2848684                                                                                                                                                                                                                                           | 54 male "relatively<br>healthy"                                                                                                                                                                                                                                                                                                                           | DID NOT VAPE e-liquids. Vaped "pure<br>cannabis oil" 32-40% of THC extracted<br>with CO2.                                                                                                                                                                                                                                       | Shortness of breath, hemoptysis                                                                                                                                                                                    | Organizing Pneumonia on<br>transbronchial biopsy                                                                                                                                                                      | Tree in Bud on CT                                                                                                                                                                                                                                                                                                                                                                                                                                                                                                                                                                                                                             | Flexible bronchoscopy yielded<br>bloody lavage fluid suspicious<br>for diffuse alveolar hemorrhage,<br>with 61% neutrophils, 8%<br>eosinophils, and 2%<br>lymphocytes. Flow cytometry of<br>the fluid showed a CD45CD8<br>ratio of 0.48                                                                                                                                                                                                                                                                                                                                                      | Organizing pneumonia                                                                                                                                                                                                                                                                                                                                                                                                                                                                        | None, resolved without<br>steroids                                                                                                                                       | Discharged home day 5.<br>steroids                                                                                                                                                                                                                         | Two weeks later,<br>monitoring<br>increased of<br>ct findings.                                                                                                                                                                                                                                                                                                                                                                       | Letter to editor,<br>case report        | Low - no e-liquid,<br>just cannabis oil                                                                                                       |                                                |
| 28                    | Respiratory bronchiolitis associated<br>with lung disease secondary to<br>electronic nicotine delivery system use<br>confirmed with open lung biopsy.<br>Dover M, Nandakumar L, Singh M,<br>Wiley D, Windsor M, Fialding D.<br>Respiratory Medicine Case Reports.<br>5(3):e02020. 2017 Oct.<br>(Case Report)<br>UI: 28392919                                                                                                                                                                     | 33-year-old male with 10<br>pack-years of traditional<br>cigarette and prior<br>treatment for mixed germ<br>cell tumor. had started<br><b>vaping</b> 10-15 times per<br>day while continuing to smoke<br>10 traditional<br>cigarettes per day. After<br>3 months of exposure to <b>e-<br/>cigarette</b> vapour, was<br>seen.                              | "Rylole Refillable e-Vapour" device with<br>"Toucan White Spirit Vapour e-Liquid<br>e-Juice." had started <b>vaping</b> 10-15 times per<br>day while continuing to smoke 10 traditional<br>cigarettes per day.                                                                                                                  | respiratory bronchiolitis<br>interstitial lung disease (PB-ILD)                                                                                                                                                    | chest computed tomography<br>demonstrated multiple well<br>poorly defined <b>pulmonary</b><br>nodules with fluffy peripheric<br>specification centered along the<br>terminal bronchiovascular units<br>(Tree in bud?) | BAL non-diagnostic                                                                                                                                                                                                                                                                                                                                                                                                                                                                                                                                                                                                                            | Video-assisted thoracoscopy with<br>lung biopsy of the right upper and<br>right middle lobes was undertaken.<br>The microscopic findings were overall<br>consistent with PB-ILD.                                                                                                                                                                                                                                                                                                                                                                                                             | None, resolved without<br>steroids                                                                                                                                                                                                                                                                                                                                                                                                                                                          | Discharged home day 5.<br>steroids                                                                                                                                       | One month later.                                                                                                                                                                                                                                           | Case report                                                                                                                                                                                                                                                                                                                                                                                                                          | Medium                                  |                                                                                                                                               |                                                |
| 29                    | Electronic cigarette usage patterns: a<br>case study combining survey and<br>social media data.<br>Zhan Y, Elbar JF, Leischow S, Zeng<br>D.<br>Journal of the American Medical<br>Association. 320(19):1918-<br>1919. Jun 01,<br>2019. (Case Report)<br>UI: 3004163                                                                                                                                                                                                                              | Online survey (n = 5132)<br>and social media dataset,<br>looking at patterns of use.                                                                                                                                                                                                                                                                      | Online survey compared to social media,<br>looking at patterns of use.                                                                                                                                                                                                                                                          |                                                                                                                                                                                                                    |                                                                                                                                                                                                                       |                                                                                                                                                                                                                                                                                                                                                                                                                                                                                                                                                                                                                                               |                                                                                                                                                                                                                                                                                                                                                                                                                                                                                                                                                                                              |                                                                                                                                                                                                                                                                                                                                                                                                                                                                                             |                                                                                                                                                                          |                                                                                                                                                                                                                                                            |                                                                                                                                                                                                                                                                                                                                                                                                                                      | Journal Article                         | Low                                                                                                                                           |                                                |
| 30                    | Cannabis Use and Bleomycin: An<br>Overview and Case Study of<br>Pulmonary Toxicity. (Review)<br>Merkle S, Timmer JS.<br>Clinical Journal of Oncology Nursing.<br>22(4):438-443. 2018 Sep 01.<br>(Case Report, Journal Article,<br>Review)<br>UI: 30035760                                                                                                                                                                                                                                        | describes the effects<br><b>cannabis</b> may have on<br>the lung, reviews<br>indications for <b>cannabis</b><br>use in patients with<br>cancer, and explores an<br>atypical case of<br>progressive <b>subcutaneous</b><br>lymphoma and <b>cannabis</b><br>use.                                                                                            | DID NOT VAPE                                                                                                                                                                                                                                                                                                                    |                                                                                                                                                                                                                    |                                                                                                                                                                                                                       |                                                                                                                                                                                                                                                                                                                                                                                                                                                                                                                                                                                                                                               |                                                                                                                                                                                                                                                                                                                                                                                                                                                                                                                                                                                              |                                                                                                                                                                                                                                                                                                                                                                                                                                                                                             |                                                                                                                                                                          |                                                                                                                                                                                                                                                            |                                                                                                                                                                                                                                                                                                                                                                                                                                      |                                         | Review Article                                                                                                                                | Low                                            |
| 31                    | Sporadic Pneumothorax After<br><b>Electronic cigarette</b> Use.<br>Mazzoni RB, Laitini D, Arino NP,<br>Falcone FN, Solitto F.<br>Chest. Conference: CHEST 2016.<br>United States. 102 (4 Supplement 1)<br>(pp S624). 2016. Date of Publication:<br>October 2016.<br>AN: 61368522                                                                                                                                                                                                                 | 17 M dyspnea and<br>disphagia, non-smoker,<br>previously healthy.                                                                                                                                                                                                                                                                                         | First <b>vaping</b> attempt, single deep<br>inhalation leading to pneumothorax                                                                                                                                                                                                                                                  | dyspnea and disphagia.                                                                                                                                                                                             | Pneumothorax                                                                                                                                                                                                          | Standard thoracic<br>radiography revealed<br>stranding locusts outlining<br>mediastinal contours, such as<br>subcutaneous emphysema<br>(Fig. 1). Chest computed<br>tomography scan showed the<br>so called "ring sign" (due to<br>air surrounding the pulmonary<br>artery and its branches) and<br>double bronchial wall (Fig.<br>2).                                                                                                                                                                                                                                                                                                         | Standard thoracic<br>radiography revealed<br>stranding locusts outlining<br>mediastinal contours, such as<br>subcutaneous emphysema<br>(Fig. 1). Chest computed<br>tomography scan showed the<br>so called "ring sign" (due to<br>air surrounding the pulmonary<br>artery and its branches) and<br>double bronchial wall (Fig.<br>2).                                                                                                                                                                                                                                                        | None                                                                                                                                                                                                                                                                                                                                                                                                                                                                                        | Monitor                                                                                                                                                                  | Discharged after day two in<br>hospital                                                                                                                                                                                                                    | Case report                                                                                                                                                                                                                                                                                                                                                                                                                          | low                                     |                                                                                                                                               |                                                |
| 32                    | Hypersensitivity Pneumonitis and<br>Acute Respiratory Distress Syndrome<br>From <b>e-Cigarette</b> Use. Sommerfeld<br>CG, Wiener DJ, Neenan A, Larkin A.<br>Pediatrics. 141(6). 2018 Oct.<br>(Case Report, Journal Article)<br>UI: 29773605                                                                                                                                                                                                                                                      | previously healthy 18-<br>year-old woman who                                                                                                                                                                                                                                                                                                              | "After <b>vaping</b> "                                                                                                                                                                                                                                                                                                          | presented with dyspnea, cough,<br>and pleuritic chest pain                                                                                                                                                         | Hypersensitivity Pneumonitis<br>and ARDS                                                                                                                                                                              | Controlled tomography of the<br>chest revealed dependent<br>opacities in both lung lobes,<br>supercardiac bronchovascular<br>interior septal thickening,<br>and pleural effusions.                                                                                                                                                                                                                                                                                                                                                                                                                                                            | bronchoalveolar lavage<br>revealed cellular debris and<br>reactive mononuclear cells, and<br>cell counts were remarkable for<br>elevated mononuclear cells and<br>eosinophilia.                                                                                                                                                                                                                                                                                                                                                                                                              | "marking for an infectious etiology<br>came back negative."                                                                                                                                                                                                                                                                                                                                                                                                                                 | intravenous<br>methylprednisolone<br>therapy was initiated.<br>After this the patient<br>rapidly improved, was<br>weaned off<br>ventilator support,<br>and was extubated | intravenous<br>methylprednisolone therapy<br>was initiated. After this the<br>patient rapidly improved, was<br>weaned off ventilator<br>support, and was extubated                                                                                         | Case report                                                                                                                                                                                                                                                                                                                                                                                                                          | medium                                  |                                                                                                                                               |                                                |
| 33                    | Sudden sensorineural hearing loss<br>associated with <b>electronic cigarette</b><br>liquid: The first case in the literature.<br>Dent E, Tapp S.<br>International Journal of Pediatric<br>Otorhinolaryngology. 114:26-28. 2018<br>Nov.<br>(Case Report, Journal Article)                                                                                                                                                                                                                         | 6 year old accidental<br>ingestion of e-liquid                                                                                                                                                                                                                                                                                                            | DID NOT VAPE. Ingested the fluid                                                                                                                                                                                                                                                                                                |                                                                                                                                                                                                                    |                                                                                                                                                                                                                       |                                                                                                                                                                                                                                                                                                                                                                                                                                                                                                                                                                                                                                               |                                                                                                                                                                                                                                                                                                                                                                                                                                                                                                                                                                                              |                                                                                                                                                                                                                                                                                                                                                                                                                                                                                             |                                                                                                                                                                          |                                                                                                                                                                                                                                                            |                                                                                                                                                                                                                                                                                                                                                                                                                                      |                                         | Case report                                                                                                                                   | low                                            |
| 34                    | Respiratory failure caused by lipid<br>pneumonia from <b>vaping e-cigarettes</b> .<br>Wasson D, Trotter S, Barge PS,<br>Walters G.<br>BMJ Case Reports. 2018. 2018 Jul<br>06.<br>(Case Report, Journal Article)<br>UI: 2982176                                                                                                                                                                                                                                                                   | Young female                                                                                                                                                                                                                                                                                                                                              | "Vaper"                                                                                                                                                                                                                                                                                                                         | young female vaper presented<br>with insidious onset cough,<br>progressive dyspnoea on<br>exertion, fever, night sweats and<br>was in respiratory failure when<br>admitted to hospital                             | Lipid pneumonia                                                                                                                                                                                                       | chest radiograph and high-<br>resolution CT showed diffuse<br>ground-glass infiltrates with<br>reticulation                                                                                                                                                                                                                                                                                                                                                                                                                                                                                                                                   | bronchoscopy and high-volume<br>lavage was unyielding                                                                                                                                                                                                                                                                                                                                                                                                                                                                                                                                        | video-assisted thoracoscopic<br>biopsy was done later and was<br>suggestive of lipid pneumonia                                                                                                                                                                                                                                                                                                                                                                                              | Hematological tests revealed only<br>thrombocytopenia, which was long<br>standing, and her biochemical and<br>inflammatory markers were normal                           | She was initially<br>treated with empirical<br>steroids and there<br>was improvement in<br>her oxygenation                                                                                                                                                 | "Despite our advice to quit<br><b>vaping</b> , she continued to use<br>EG with different flavours and<br>there is not much<br>improvement in her clinical<br>and spirometric parameters."                                                                                                                                                                                                                                            | Case report                             | medium                                                                                                                                        |                                                |
| 35                    | Sporadic coronary artery<br>dissection in a postpartum <b>e-cigarette</b><br>smoker.<br>Kinnery N, Kinnery A, Gandhi H,<br>She J.J.<br>BMJ Case Reports. 2018. 2018 Jun<br>04.<br>(Case Report, Journal Article)<br>UI: 2989594                                                                                                                                                                                                                                                                  | 41-year-old woman with<br>no significant medical<br>history, but was a habitual<br><b>e-cigarette</b> smoker                                                                                                                                                                                                                                              | habitual <b>e-cigarette</b> smoker                                                                                                                                                                                                                                                                                              | presented with atypical chest<br>pain 2 weeks after an<br>uncomplicated delivery while<br>breast feeding                                                                                                           |                                                                                                                                                                                                                       | Standard thoracic<br>radiography revealed<br>stranding locusts outlining<br>mediastinal contours, such as<br>subcutaneous emphysema<br>(Fig. 1). Chest computed<br>tomography scan showed the<br>so called "ring sign" (due to<br>air surrounding the pulmonary<br>artery and its branches) and<br>double bronchial wall (Fig.<br>2).                                                                                                                                                                                                                                                                                                         | Standard thoracic<br>radiography revealed<br>stranding locusts outlining<br>mediastinal contours, such as<br>subcutaneous emphysema<br>(Fig. 1). Chest computed<br>tomography scan showed the<br>so called "ring sign" (due to<br>air surrounding the pulmonary<br>artery and its branches) and<br>double bronchial wall (Fig.<br>2).                                                                                                                                                                                                                                                        | None                                                                                                                                                                                                                                                                                                                                                                                                                                                                                        | Monitor                                                                                                                                                                  | Discharged after day two in<br>hospital                                                                                                                                                                                                                    | Case report                                                                                                                                                                                                                                                                                                                                                                                                                          | low                                     |                                                                                                                                               |                                                |
| 36                    | Organizing pneumonia related to<br><b>electronic cigarette</b> use. A case report<br>and review of literature. (Review)<br>Khan MS, Khatab F, Ahtar J, Khan<br>Z, Liu A, Nhoobdoobay V, Hammerley<br>J.<br>The clinical respiratory journal.<br>13(3):126-129. 2018 Mar.<br>(Case Report, Journal Article,<br>Review)<br>UI: 2932888                                                                                                                                                             | 40-year-old female patient.<br>She reported increased use of a cigarette<br>during this time period to help her quit<br>smoking.                                                                                                                                                                                                                          | patient presented with symptoms<br>of worsening dyspnoea and<br>intermittent chest pain for past 4<br>months. Patient developed acute<br>hypoxemic respiratory failure<br>requiring intubation and<br>mechanical ventilation                                                                                                    | organizing pneumonia                                                                                                                                                                                               | Organizing pneumonia on open lung<br>biopsy                                                                                                                                                                           |                                                                                                                                                                                                                                                                                                                                                                                                                                                                                                                                                                                                                                               |                                                                                                                                                                                                                                                                                                                                                                                                                                                                                                                                                                                              |                                                                                                                                                                                                                                                                                                                                                                                                                                                                                             | treated with steroids<br>along with abstinence<br>from a cigarette use.                                                                                                  | "Successfully treated with<br>steroids"                                                                                                                                                                                                                    | Case report                                                                                                                                                                                                                                                                                                                                                                                                                          | Medium                                  |                                                                                                                                               |                                                |
| 37                    | Flavored <b>e-cigarette</b> liquids reduce<br>proliferation and viability in the CALU3<br>airway epithelial cell line.<br>Raevel TR, Neeter SL, Lee SL, Harris<br>RA, Nethery RC, Herring AH, Ghah<br>SA, Tarran R.<br>American Journal of Physiology -<br>Lung Cellular & Molecular Physiology.<br>313(1):L52-L68. 2017 Oct 01.<br>(Journal Article, Research Support,<br>N.I.H., Extramural, Research Support,<br>Non-U.S. Gov't)<br>UI: 29428175                                              | Tested multiple flavours of<br>e-liquids                                                                                                                                                                                                                                                                                                                  | 13 different flavored e-liquids, gas<br>chromatography-mass spectrometry.                                                                                                                                                                                                                                                       | demonstrated a dose-dependent<br>decrease of MTT (metabolism by<br>all flavors tested)                                                                                                                             |                                                                                                                                                                                                                       |                                                                                                                                                                                                                                                                                                                                                                                                                                                                                                                                                                                                                                               |                                                                                                                                                                                                                                                                                                                                                                                                                                                                                                                                                                                              |                                                                                                                                                                                                                                                                                                                                                                                                                                                                                             |                                                                                                                                                                          |                                                                                                                                                                                                                                                            | "The 13 flavored e-liquids have<br>decreased MTT metabolism by<br>all flavors tested."<br>Since all of the flavors<br>exhibited some degree of<br>toxicity and a diverse array of<br>chemical constituents with the<br>inhalation toxicity available, we<br>conclude that flavored e-<br>liquids should be extensively<br>tested on a case-by-case<br>basis to determine the<br>potential for toxicity in the lung<br>and elsewhere. | Journal Article                         | low                                                                                                                                           |                                                |
| 38                    | Clozapine and the <b>electronic<br/>cigarette</b> : a case study. (Review)<br>Dabiri Steen vasingen von<br>Gussappegel no overschaalen<br>was i badische up elektronische<br>sigaretten.<br>Nanner TS, Timmer SJ.<br>Tijdschrift voor Psychiatrie. 55(4):314-<br>7. 2015.<br>(Case Report, Journal Article,<br>Review)<br>UI: 2902924                                                                                                                                                            | patient who switched from<br>traditional cigarettes to<br><b>electronic</b> cigarettes and<br>therapeutic had a<br>significant increase in the<br>clozapine serum level                                                                                                                                                                                   | increased level led to<br>considerable side-effects and,<br>as a result, the patient's<br>clozapine dosage had to be<br>reduced.                                                                                                                                                                                                |                                                                                                                                                                                                                    |                                                                                                                                                                                                                       |                                                                                                                                                                                                                                                                                                                                                                                                                                                                                                                                                                                                                                               |                                                                                                                                                                                                                                                                                                                                                                                                                                                                                                                                                                                              |                                                                                                                                                                                                                                                                                                                                                                                                                                                                                             |                                                                                                                                                                          |                                                                                                                                                                                                                                                            |                                                                                                                                                                                                                                                                                                                                                                                                                                      |                                         | Case report                                                                                                                                   | low                                            |



|                                                                                                         |                                                                                                                                                                                                                                                                                                                                                                                                               |                                                                                                                                                                                                                                                                                                                                                                                     |                                                                                                                                                                                                                                         |                                                                                                                                                                                                                                        |                                                                                                                                                                                                                                                                                                                                                                                                                                                                                                                                                                                                                                                                                                                                                                                                                                                                                                                                                                                                                              |                                                                                                                                                                                                                                                                                                                                                                                                                                                                                                                                                                                                                                                                                                                                                                         |                                                                                                                                                                                                                                                                                                                                                                                                                                                                                                                                                                                                   |                                                                                                                                                                                                                                                                                                                                                           |                                                                                                                                                                                                          |                                                                                                                                                                                                                                                                         |                                                                         |                                   |          |  |  |  |
|---------------------------------------------------------------------------------------------------------|---------------------------------------------------------------------------------------------------------------------------------------------------------------------------------------------------------------------------------------------------------------------------------------------------------------------------------------------------------------------------------------------------------------|-------------------------------------------------------------------------------------------------------------------------------------------------------------------------------------------------------------------------------------------------------------------------------------------------------------------------------------------------------------------------------------|-----------------------------------------------------------------------------------------------------------------------------------------------------------------------------------------------------------------------------------------|----------------------------------------------------------------------------------------------------------------------------------------------------------------------------------------------------------------------------------------|------------------------------------------------------------------------------------------------------------------------------------------------------------------------------------------------------------------------------------------------------------------------------------------------------------------------------------------------------------------------------------------------------------------------------------------------------------------------------------------------------------------------------------------------------------------------------------------------------------------------------------------------------------------------------------------------------------------------------------------------------------------------------------------------------------------------------------------------------------------------------------------------------------------------------------------------------------------------------------------------------------------------------|-------------------------------------------------------------------------------------------------------------------------------------------------------------------------------------------------------------------------------------------------------------------------------------------------------------------------------------------------------------------------------------------------------------------------------------------------------------------------------------------------------------------------------------------------------------------------------------------------------------------------------------------------------------------------------------------------------------------------------------------------------------------------|---------------------------------------------------------------------------------------------------------------------------------------------------------------------------------------------------------------------------------------------------------------------------------------------------------------------------------------------------------------------------------------------------------------------------------------------------------------------------------------------------------------------------------------------------------------------------------------------------|-----------------------------------------------------------------------------------------------------------------------------------------------------------------------------------------------------------------------------------------------------------------------------------------------------------------------------------------------------------|----------------------------------------------------------------------------------------------------------------------------------------------------------------------------------------------------------|-------------------------------------------------------------------------------------------------------------------------------------------------------------------------------------------------------------------------------------------------------------------------|-------------------------------------------------------------------------|-----------------------------------|----------|--|--|--|
| 39                                                                                                      | A Cancer That Went Up in Smoke: Primary Reaction to e-Cigarettes Initiating Metastatic Cancer. Ring Madison L, Vintner Kristin M, Bergmann T, Eisenstein S, Naghbat S, Dinal L, Knudson ST. Chest. 146(3):e657. 2015 Mar. [Case Reports. Journal Article] U: 2955575                                                                                                                                          | a 45-year-old female consumer of e-cigarettes                                                                                                                                                                                                                                                                                                                                       | presented with 4 months of abdominal pain and fever                                                                                                                                                                                     | Lung and liver nodules. Multiple multinucleate giant cell foreign body reaction to lipophilic material                                                                                                                                 | multiple pulmonary nodules and liver lesions suggestive of widespread metastases.                                                                                                                                                                                                                                                                                                                                                                                                                                                                                                                                                                                                                                                                                                                                                                                                                                                                                                                                            | lung biopsy revealed an area with multinucleated giant cells suggestive of a foreign body reaction to a lipophilic material.                                                                                                                                                                                                                                                                                                                                                                                                                                                                                                                                                                                                                                            | "an extensive evaluation found no evidence of malignancy."                                                                                                                                                                                                                                                                                                                                                                                                                                                                                                                                        | Cessation                                                                                                                                                                                                                                                                                                                                                 | Upon cessation of e-cigarettes use (known as vaping), the lung nodules disappeared, and the liver lesions regressed                                                                                      | Case report                                                                                                                                                                                                                                                             | low                                                                     |                                   |          |  |  |  |
| 40                                                                                                      | Infused medical cannabis and the immunocompromised patient. Rucklimer R, Amel-Kohn M, Resch D, Hirsch L. Supportive Care in Cancer. 23(3):819-22. 2015 Mar. [Case Reports. Journal Article] U: 2521651                                                                                                                                                                                                        | Not patient based. Goal: identify the safest way of using medical cannabis in immunosuppressed patients by finding the optimal method of administration with minimal loss of activity                                                                                                                                                                                               | Not related to vaping                                                                                                                                                                                                                   | Looked at opportunistic microorganisms and ways to sterilize cannabis                                                                                                                                                                  |                                                                                                                                                                                                                                                                                                                                                                                                                                                                                                                                                                                                                                                                                                                                                                                                                                                                                                                                                                                                                              |                                                                                                                                                                                                                                                                                                                                                                                                                                                                                                                                                                                                                                                                                                                                                                         |                                                                                                                                                                                                                                                                                                                                                                                                                                                                                                                                                                                                   |                                                                                                                                                                                                                                                                                                                                                           |                                                                                                                                                                                                          | Journal Article                                                                                                                                                                                                                                                         | low                                                                     |                                   |          |  |  |  |
| 41                                                                                                      | Electronic cigarettes: a review of safety and clinical issues. [Review] Weaver M, Breland A, Spinola T, Eisenberg. Journal of Addiction Medicine. 9(4):234-40. 2014 Jul-Aug. [Case Reports. Journal Article. Research Support, U.S. Gov'. P.H.S. Review] U: 2529963                                                                                                                                           | Fictional amalgamations of actual patients.                                                                                                                                                                                                                                                                                                                                         | Broad overview. No factual cases. No discussion of adverse events                                                                                                                                                                       |                                                                                                                                                                                                                                        |                                                                                                                                                                                                                                                                                                                                                                                                                                                                                                                                                                                                                                                                                                                                                                                                                                                                                                                                                                                                                              |                                                                                                                                                                                                                                                                                                                                                                                                                                                                                                                                                                                                                                                                                                                                                                         |                                                                                                                                                                                                                                                                                                                                                                                                                                                                                                                                                                                                   |                                                                                                                                                                                                                                                                                                                                                           |                                                                                                                                                                                                          | Case reports (3 fictitious cases)                                                                                                                                                                                                                                       | low                                                                     |                                   |          |  |  |  |
| 42                                                                                                      | Case report of electronic cigarette possibly associated with eosinophilic pneumonitis in a previously healthy young adult male. Thota D, Latham E. Journal of Emergency Medicine. 47(1):157. 2014 Jul. [Case Reports. Journal Article] U: 2448204                                                                                                                                                             | 20-year-old previously healthy man, sailor                                                                                                                                                                                                                                                                                                                                          | 3 days of persistent cough, shortness of breath, and facial flushing. "noticed symptom cluster beginning 1h after smoking an e-cigarette 3 days prior"                                                                                  | acute eosinophilic pneumonia                                                                                                                                                                                                           | CXR "acute diffuse patchy reticulonodular opacities." CT Chest: no evidence of pulmonary embolism with predominantly diffuse ground-glass opacities involving the upper and middle lobes of the lung more than lower lobes. Considerations include opportunistic infection such as pneumocystis jirovecii versus atypical or viral pneumonias. Acute allergic disease such as diffuse alveolar hemorrhage, drug toxicity, or hypersensitivity pneumonitis is on the differential                                                                                                                                                                                                                                                                                                                                                                                                                                                                                                                                             | pulmonary report suggested no evidence of bacteria, viruses, fungus, parasites, or neoplasm via bronchoscopy, sputum, and serum laboratory tests                                                                                                                                                                                                                                                                                                                                                                                                                                                                                                                                                                                                                        | Coc 2.0% eosinophils, bronchial alveolar lavage demonstrated "abundant macrophages, eosinophils, and scattered benign respiratory epithelial cells. There are no chunky eosinophilic inclusions identified in the macrophages. The right upper lobe cell count yielded 3268 WBCs [white blood cells] with 3% neutrophils, 2% eosinophils, 17% macrophages and 74% eosinophils.                                                                                                                                                                                                                    | started him on albuterol, and there was no improvement in his symptoms. 1 gm of ceftriaxone and 100 mg of dicyclanil for initial treatment of community-acquired pneumonia. Treated with antibiotics and steroids and his symptoms improved. 50 mg of prednisone and was discharged from the hospital on hospital day 5 with improvement in his symptoms. | 7 day 1h CXR on pred symptoms improved                                                                                                                                                                   | a follow-up 2 days later with Pulmonology, at which time he stated he was feeling better and that his symptoms had almost completely resolved. A repeat chest x-ray study performed 1 week later showed significant interval improvement of the left lung base opacity. | Case report                                                             | medium                            |          |  |  |  |
| 43                                                                                                      | A case report of subacute bronchovascular interstitial pneumonia induced by an electronic cigarette. Haines J, Drowe M, Uhan T, Thorpe. 86(6):596-7. 2014 Jun. [Case Reports. Critical Care Medicine. Journal Article] U: 2443627                                                                                                                                                                             | 43M history of primary lung adenocarcinoma resected 18 months prior. A documented isolated bronchiectasis stage (pT2N0M0) treated by stereotactic brain radiotherapy, right upper lobectomy and chemotherapy. On surveillance for 7 months                                                                                                                                          | La dynamique" by CIGARETTE and two "e-liquids" (Nicotily 19 mg/ml of nicotine) and Eastern (19 mg/ml of nicotine) (Conceplains). Vaped 25 times a day, taking 5-6 puffs each time, which enabled him to stop smoking tobacco cigarettes | After 48 h, the patient described onset of cough with whitish secretions. He subsequently developed progressive breathlessness on minimal exertion (Sudol Stage 5) over a period of 1 week. Sought medical attention after four weeks. | "Suspected bronchitis"                                                                                                                                                                                                                                                                                                                                                                                                                                                                                                                                                                                                                                                                                                                                                                                                                                                                                                                                                                                                       | CT not done. CXR not different to previous.                                                                                                                                                                                                                                                                                                                                                                                                                                                                                                                                                                                                                                                                                                                             | None done                                                                                                                                                                                                                                                                                                                                                                                                                                                                                                                                                                                         |                                                                                                                                                                                                                                                                                                                                                           |                                                                                                                                                                                                          |                                                                                                                                                                                                                                                                         | Normal pre-bronchov. Mwd obstructive (restrictive, P/FVC 74%, FEV1 45%) | case report, case conference      | medium   |  |  |  |
| 44                                                                                                      | An unexpected consequence of electronic cigarette use. McCaskey L, Martin C, Hoerner D. Chest. 141(1):110-113. 2012 Apr. [Case Reports. Journal Article] U: 2247495                                                                                                                                                                                                                                           | 42-year-old woman admitted to the hospital with a 7-month history of dyspnea, productive cough, and subjective fevers. She had been seen multiple times in the ED with similar complaints and had received several courses of antibiotics. Her past medical history also was significant for asthma, reported rheumatoid arthritis, ti bomyalgia, schizophrenia, and hypothyroidism | had recently started using electronic cigarettes (e-cigarettes), about 7 months prior, which coincided with the onset of her respiratory symptoms                                                                                       | Eosinophilic lipid pneumonia due to e-cigarette use.                                                                                                                                                                                   | Chest radiographic imaging showed bilateral, bilateral opacities. CT images (Fig 1) revealed extensive bilateral peripheral lower-lobe patchy ground glass pulmonary opacities in a "crazy paving" pattern. Bronchoscopy and BAL were performed. The cell count showed 48% neutrophils, 8% lymphocytes, 47% macrophages, and 1% eosinophils. Results of all bacterial and viral cultures remained negative. Fungal cultures showed light growth of Candida. Results of a nasal Botrytis polysaccharide chain reaction swab were negative. Results of urine Legionella antigen and serum Mycoplasma IgG and IgM tests were negative. Results of a hypersensitivity pneumonitis panel, extracted nuclear antigen panel, and tests for antimicrobial antibody, cyclic citrullinated peptide, and rheumatoid factor were negative. A hist factor 3 panel showed trace reactivity to salmon and Hb of IgG. Investigations for infection and immunological disorder were negative and toxicology was negative except for cannabis. | WBC count of 18.0 (13.0-3.1) with a normal differential and hemoglobin level of 11.2 g/dL. The chemistry panel and brain natriuretic peptide levels were normal. Results of an HIV test were negative. Results of a nasal Botrytis polysaccharide chain reaction swab were negative. Results of urine Legionella antigen and serum Mycoplasma IgG and IgM tests were negative. Results of a hypersensitivity pneumonitis panel, extracted nuclear antigen panel, and tests for antimicrobial antibody, cyclic citrullinated peptide, and rheumatoid factor were negative. A hist factor 3 panel showed trace reactivity to salmon and Hb of IgG. Investigations for infection and immunological disorder were negative and toxicology was negative except for cannabis. | The patient was instructed to avoid the use of e-cigarettes, and subsequently her symptoms improved.                                                                                                                                                                                                                                                                                                                                                                                                                                                                                              | A follow-up chest radiograph was normal, and pulmonary function testing showed mild diffusion impairment but no obstructive or restrictive defects.                                                                                                                                                                                                       | Not listed                                                                                                                                                                                               |                                                                                                                                                                                                                                                                         |                                                                         |                                   |          |  |  |  |
| 45                                                                                                      | Fatal alveolar hemorrhage following a "bang" of cannabis. [French] Hemorragie alvéolaire fatale après bang de cannabis. Gossain F, Andre M, Rabbe B, Corbeau E, Vincennes UJ, Pakeon N. Revue des Maladies Respiratoires. 28(7):919-21. 2011 Sep. [Case Reports. English Abstract. Journal Article] U: 2194339                                                                                                | did not vape                                                                                                                                                                                                                                                                                                                                                                        | haemoptysis                                                                                                                                                                                                                             | DAH                                                                                                                                                                                                                                    | CT scan showed bilateral, diffuse alveolar shadowing                                                                                                                                                                                                                                                                                                                                                                                                                                                                                                                                                                                                                                                                                                                                                                                                                                                                                                                                                                         | Bronchoalveolar lavage revealed massive alveolar hemorrhage.                                                                                                                                                                                                                                                                                                                                                                                                                                                                                                                                                                                                                                                                                                            | Autopsy showed toxic alveolar hemorrhage.                                                                                                                                                                                                                                                                                                                                                                                                                                                                                                                                                         | Trace reactivity to salmon and Hb of IgG. Investigations for infection and immunological disorder were negative and toxicology was negative except for cannabis.                                                                                                                                                                                          | Antibiotic treatment was given and favorable progress allowed early discharge.                                                                                                                           | Death occurred 15 days later due to alveolar hemorrhage following a further "bang" of cannabis.                                                                                                                                                                         | case report                                                             | low                               |          |  |  |  |
| NEW ARTICLES FROM THIS POINT ON. 25 NEW ENTRIES. October 15, 2019 - October 30, 2019 (2" search update) |                                                                                                                                                                                                                                                                                                                                                                                                               |                                                                                                                                                                                                                                                                                                                                                                                     |                                                                                                                                                                                                                                         |                                                                                                                                                                                                                                        |                                                                                                                                                                                                                                                                                                                                                                                                                                                                                                                                                                                                                                                                                                                                                                                                                                                                                                                                                                                                                              |                                                                                                                                                                                                                                                                                                                                                                                                                                                                                                                                                                                                                                                                                                                                                                         |                                                                                                                                                                                                                                                                                                                                                                                                                                                                                                                                                                                                   |                                                                                                                                                                                                                                                                                                                                                           |                                                                                                                                                                                                          |                                                                                                                                                                                                                                                                         |                                                                         |                                   |          |  |  |  |
| 46                                                                                                      | Pleural effusion with electronic cigarette use. A not-so-safe alternative to tobacco. Mazurek C, Dale-Layne J, Mazurek W, Oka B. Embase Classic-Embase. Conference: Hospital Medicine, Journal of Hospital Medicine, Conference: Hospital Medicine, 2018, United States. 13 (4 Supplement 1) (no pagination). 2018. Date of Publication: 2018. [Conference Abstract] AN: 62665637                             | 63M former cigarette smoker, having smoked approximately 1 pack per day for 40 years, who had recently transitioned to using electronic cigarettes, or "vaping."                                                                                                                                                                                                                    | progressive dyspnea and associated hemoptysis of several days duration                                                                                                                                                                  | Pleural Effusion                                                                                                                                                                                                                       | Chest radiograph revealed a new left-sided pleural effusion. Subsequent CT angiogram of the chest and pulmonary arteries was without pulmonary embolism but confirmed the presence of the left-sided effusion. Repeat CT of the chest revealed an 8 mm pleural-based thickening on the right but no findings on the left. A week repeat CT of the chest following absence from further vaping was without re-accumulation of the left-sided effusion. The pleural thickening noted on the right was associated with:                                                                                                                                                                                                                                                                                                                                                                                                                                                                                                         | There was no microbiology and initial negative work up (ie, sputum, thoracentesis, 700mL, serology negative by LIGHT criteria. Cytology was negative for malignant cells.                                                                                                                                                                                                                                                                                                                                                                                                                                                                                                                                                                                               | Abstaining from e-cigs                                                                                                                                                                                                                                                                                                                                                                                                                                                                                                                                                                            | No reaccumulation. Pleural thickening stable.                                                                                                                                                                                                                                                                                                             | 28                                                                                                                                                                                                       |                                                                                                                                                                                                                                                                         | Case Report                                                             | Low                               |          |  |  |  |
| 47                                                                                                      | Imaging of vaping-associated lung disease. Herry T.S., Kanne J.P., Kigerman S.J. Embase Classic-Embase. New England Journal of Medicine. 361(15) (pp 1486-1487). 2019. Date of Publication: 10 Oct 2019. [Letter] AN: 62564917 PMID: 31491070 <a href="https://www.ncbi.nlm.nih.gov/pubmed/31491070">https://www.ncbi.nlm.nih.gov/pubmed/31491070</a>                                                         | Case Series 34 Patients details not discussed. 19 cases seen by authors. 15 cases from the literature                                                                                                                                                                                                                                                                               | identified four imaging patterns that correlated with pathological findings attributable to vaping, including acute eosinophilic pneumonia, diffuse alveolar damage, organizing pneumonia, and lipid pneumonia.                         |                                                                                                                                                                                                                                        |                                                                                                                                                                                                                                                                                                                                                                                                                                                                                                                                                                                                                                                                                                                                                                                                                                                                                                                                                                                                                              |                                                                                                                                                                                                                                                                                                                                                                                                                                                                                                                                                                                                                                                                                                                                                                         |                                                                                                                                                                                                                                                                                                                                                                                                                                                                                                                                                                                                   |                                                                                                                                                                                                                                                                                                                                                           |                                                                                                                                                                                                          |                                                                                                                                                                                                                                                                         |                                                                         | Correspondence                    | High     |  |  |  |
| 48                                                                                                      | Pulmonary lipid-laden macrophages not normal. Mussack S.D., Cirilo M.M., Calahan S.J., Kanan L.H., Frazee C.S., Raman S.M., Abernig S.K. Embase Classic-Embase. New England Journal of Medicine. 361(15) (pp 1488-1489). 2019. Date of Publication: 10 Oct 2019. [Letter] AN: 62564919 PMID: 31491073 <a href="https://www.ncbi.nlm.nih.gov/pubmed/31491073">https://www.ncbi.nlm.nih.gov/pubmed/31491073</a> | Case series 3 patients, not normal. 63M former cigarette smoker, having smoked approximately 1 pack per day for 40 years, who had recently transitioned to using electronic cigarettes, or "vaping."                                                                                                                                                                                | presented with 1 week of dyspnea, cough, abnormal pain, nausea, and vomiting.                                                                                                                                                           | ARDS                                                                                                                                                                                                                                   | BAL lipid laden macrophages were present from 20% to 70%. The BAL samples macrophage predominant. One neutrophilic predominance.                                                                                                                                                                                                                                                                                                                                                                                                                                                                                                                                                                                                                                                                                                                                                                                                                                                                                             | negative HIV testing and a relatively elevated level of C-reactive protein (307 mg per deciliter). Neutrophilic lymphocytosis.                                                                                                                                                                                                                                                                                                                                                                                                                                                                                                                                                                                                                                          | 2 patients high dose corticosteroids. One patient received antibiotics. One patient received immunosuppressants only.                                                                                                                                                                                                                                                                                                                                                                                                                                                                             | All patients survived.                                                                                                                                                                                                                                                                                                                                    | None                                                                                                                                                                                                     | WV ECMO in one patient.                                                                                                                                                                                                                                                 | Correspondence                                                          | High                              |          |  |  |  |
| 49                                                                                                      | Lung Biopsy Findings in Severe Pulmonary Illness Associated With E-Cigarette Use (Vaping). Mulholland S., Mirvad M., Dammer P., Arava A.V., Saria R., Brenner D.S., Maldonado F., Choi H., Choudhri M. Embase Classic-Embase. American Journal of Clinical Pathology. (no pagination). 2019. Date of Publication: 17 Oct 2019. [Article] AN: 62622317                                                         | Case series 8 patients. eight men (aged 19-61 years) with respiratory symptoms following e-cigarette use                                                                                                                                                                                                                                                                            | All patients reported vaping THC; two were also using nicotine. One individual had a history of asthma. One patient used "bank brand" THC                                                                                               | most common presenting symptoms were fever (n = 7/8 patients), cough (n = 6/8), and dyspnea (n = 5/8). Most patients unresponsive to antibiotic therapy, or a combination of these patterns.                                           | acute lung injury, manifesting as organizing pneumonia, diffuse alveolar damage (DAD), and dyspnea (n = 5/8). Most patients unresponsive to antibiotic therapy, or a combination of these patterns.                                                                                                                                                                                                                                                                                                                                                                                                                                                                                                                                                                                                                                                                                                                                                                                                                          | Imaging showed diffuse bilateral ground-glass opacities in all patients                                                                                                                                                                                                                                                                                                                                                                                                                                                                                                                                                                                                                                                                                                 | Lung biopsies (seven transbronchial, one surgical) showed acute lung injury, including organizing pneumonia and/or diffuse alveolar damage. Common features were fibroblast plugs, hyaline membranes, fibrous exudates, type 2 pneumocyte hyperplasia, and interstitial organization. Some cases featured a sparse interstitial chronic inflammatory infiltrate. Although macrophages were present within the airspaces in all cases, this feature was not prominent, and findings were not consistent with organizing pneumonia. Histologic findings were supportive of diffuse alveolar damage. | Workup for infection was negative in all cases, and there was no evidence for other etiologies.                                                                                                                                                                                                                                                           | Corticosteroids                                                                                                                                                                                          | One death. Others recovered with corticosteroid therapy                                                                                                                                                                                                                 | One patient required mechanical ventilation                             | Journal Article                   | High     |  |  |  |
| 50                                                                                                      | Diffuse alveolar damage and e-cigarettes: Case report and review of literature. Balle S.A., Alf-Fari T.S., Alf-Fari S. Embase Classic-Embase. Respiratory Medicine Case Reports. 8 (no pagination). 2019. Article Number: 100555. Date of Publication: 2019. [Article] AN: 200268528                                                                                                                          | 47-year-old woman with a history of asthma, severe depression, and obesity                                                                                                                                                                                                                                                                                                          | had been smoking e-cigarettes for 3 years prior to presentation.                                                                                                                                                                        | 4-day history of progressively worsening shortness of breath, nasal congestion, fevers, chills, cough, lower extremity swelling, and generalized body aches.                                                                           | Diffuse alveolar damage (DAD)                                                                                                                                                                                                                                                                                                                                                                                                                                                                                                                                                                                                                                                                                                                                                                                                                                                                                                                                                                                                | Chest CT with contrast revealed bilateral diffuse predominant ground glass attenuation with scattered alveolar opacities of the lungs. Due to critical deterioration, a repeat chest CT without contrast done 9 days after showed mild consolidation in bilateral lungs which had worsened when compared to previous CT. Small trace pleural effusions were present but no pneumothorax.                                                                                                                                                                                                                                                                                                                                                                                | CRB with differential showed a leukocytosis of 9.7, hemoglobin and lower lung lobes was performed which revealed a diffuse alveolar septal thickening, due to combination of fibroblastic proliferation and alveolar lining cell hyperplasia. Scattered eosinophilic hyaline membranes were also present and these findings were supportive of diffuse alveolar damage.                                                                                                                                                                                                                           | Antibiotics, steroids, azithromycin.                                                                                                                                                                                                                                                                                                                      | Discharged to long term care center. CT scan done about 3 months following discharge showed significant improvement in the previously seen infiltrates with complete resolution in the upper lung zones. | 3 months                                                                                                                                                                                                                                                                | Mechanical ventilation                                                  | Journal Article                   | High     |  |  |  |
| 51                                                                                                      | GRANULOMATOSIS DUE TO ELECTRONIC CIGARETTE USE. Lin C, Cho H. Embase Classic-Embase. Chest. Conference: CHEST 2019 Annual Meeting, United States. 156 (4 Supplement) (p 2020). 2019. Date of Publication: October 2019. [Conference Abstract] AN: 200398304                                                                                                                                                   | 34 year old female, prior tobacco smoker, with a history of carcinoma tumor                                                                                                                                                                                                                                                                                                         | Started vaping two months prior to symptoms                                                                                                                                                                                             | presented to clinic ten months post-operatively with new-onset cough and wheezing                                                                                                                                                      | Granulomatosis                                                                                                                                                                                                                                                                                                                                                                                                                                                                                                                                                                                                                                                                                                                                                                                                                                                                                                                                                                                                               | CT scan demonstrated interval development of bilateral micronodules consistent with granulomatosis or inflammatory bronchiolitis, and follow-up CT scan one month later demonstrated increased burden of reticulonodular opacities and mediastinal lymphadenopathy.                                                                                                                                                                                                                                                                                                                                                                                                                                                                                                     | Transbronchial biopsy, pathology demonstrates multinucleated giant cells with eosinophilic cytoplasm, compatible with a granulomatosis secondary to electronic cigarette use.                                                                                                                                                                                                                                                                                                                                                                                                                     | Empiric antibiotics not effective.                                                                                                                                                                                                                                                                                                                        |                                                                                                                                                                                                          |                                                                                                                                                                                                                                                                         | Case report - conference abstract                                       | Medium                            |          |  |  |  |
| 52                                                                                                      | Vaping is a risk factor for spontaneous pneumothorax: Two cases. Stanton N.J., Sullivan G.A., Madonna M.B., Shah A.N. Embase Classic-Embase. Journal of Pediatric Surgery Case Reports. 50 (no pagination). 2019. Article Number: 101302. Date of Publication: November 2019. [Article] AN: 200327927                                                                                                         | present two male patients age 15 and 16                                                                                                                                                                                                                                                                                                                                             | spontaneous pneumothorax after vaping and were initially treated with tube thorostomy placement                                                                                                                                         | spontaneous pneumothorax                                                                                                                                                                                                               |                                                                                                                                                                                                                                                                                                                                                                                                                                                                                                                                                                                                                                                                                                                                                                                                                                                                                                                                                                                                                              |                                                                                                                                                                                                                                                                                                                                                                                                                                                                                                                                                                                                                                                                                                                                                                         |                                                                                                                                                                                                                                                                                                                                                                                                                                                                                                                                                                                                   |                                                                                                                                                                                                                                                                                                                                                           |                                                                                                                                                                                                          |                                                                                                                                                                                                                                                                         |                                                                         | Journal Article                   | Low      |  |  |  |
| 53                                                                                                      | Effect of e-cigarette exposure on production of endotoxin factors by Pseudomonas aeruginosa. Gallagher K., McKee K.A., Carson G., Turney M., Gilpin D. Embase Classic-Embase. Journal of Critical Care. Conference: 42nd European Critical Care Conference, United Kingdom. 18 (Supplement 1) (p 586). 2019. Date of Publication: June 2019. [Conference Abstract] AN: 200197678                              | In-vitro study, four Pseudomonas aeruginosa isolates.                                                                                                                                                                                                                                                                                                                               | strawberry e-cigarette vapour extract (ECVE), common ECVE, flavoured ECVE and propylene glycol/vegetable glycerin (PGVG) ECVE                                                                                                           | increased complain of sudden onset chest pain that occurred immediately after forcefully clearing his throat                                                                                                                           | Spontaneous Pneumothorax                                                                                                                                                                                                                                                                                                                                                                                                                                                                                                                                                                                                                                                                                                                                                                                                                                                                                                                                                                                                     | Radiographic studies of the chest and neck as well as Computerized Axial Tomography were positive for a large pneumothorax with air dissecting the soft tissues of the neck                                                                                                                                                                                                                                                                                                                                                                                                                                                                                                                                                                                             | IV Ceftriaxone, conservative.                                                                                                                                                                                                                                                                                                                                                                                                                                                                                                                                                                     | Discharged after day ten in hospital                                                                                                                                                                                                                                                                                                                      | none                                                                                                                                                                                                     |                                                                                                                                                                                                                                                                         | Case report - conference abstract                                       | Very low                          |          |  |  |  |
| 54                                                                                                      | Oropharyngeal Injury From Spontaneous Combustion of a Lithium Ion Battery: A Case Report. Stone J., Thross S., Gelbard A. Embase Classic-Embase. Laryngoscope. 129(1) (p 45-48). 2019. Date of Publication: January 2019. [Review] AN: 62399091                                                                                                                                                               | 16-year-old Asian male with prior history of moderate persistent asthma, with no exacerbations for more than a year.                                                                                                                                                                                                                                                                | uses an electronic cigarette occasionally                                                                                                                                                                                               | presented complaining of sudden onset chest pain that occurred immediately after forcefully clearing his throat                                                                                                                        | Spontaneous Pneumothorax                                                                                                                                                                                                                                                                                                                                                                                                                                                                                                                                                                                                                                                                                                                                                                                                                                                                                                                                                                                                     | Radiographic studies of the chest and neck as well as Computerized Axial Tomography were positive for a large pneumothorax with air dissecting the soft tissues of the neck                                                                                                                                                                                                                                                                                                                                                                                                                                                                                                                                                                                             | IV Ceftriaxone, conservative.                                                                                                                                                                                                                                                                                                                                                                                                                                                                                                                                                                     | Discharged after day ten in hospital                                                                                                                                                                                                                                                                                                                      | none                                                                                                                                                                                                     |                                                                                                                                                                                                                                                                         | Case report - conference abstract                                       | Very low                          |          |  |  |  |
| 55                                                                                                      | e-Cigarette technology causing burn injury. Stein J.F., Abraham A. Embase Classic-Embase. Journal of General Internal Medicine. Conference: 41st Annual Meeting of the Society of General Internal Medicine, SCIM 2018, United States. 33 (2 Supplement 1) (p 514). 2018. Date of Publication: 2018. [Conference Abstract] AN: 62323154                                                                       | 72 year old, gender not disclosed                                                                                                                                                                                                                                                                                                                                                   | Facial burns while vaping on oxygen                                                                                                                                                                                                     | Facial burns while vaping on oxygen                                                                                                                                                                                                    | Second degree burns to face and oropharynx                                                                                                                                                                                                                                                                                                                                                                                                                                                                                                                                                                                                                                                                                                                                                                                                                                                                                                                                                                                   |                                                                                                                                                                                                                                                                                                                                                                                                                                                                                                                                                                                                                                                                                                                                                                         |                                                                                                                                                                                                                                                                                                                                                                                                                                                                                                                                                                                                   |                                                                                                                                                                                                                                                                                                                                                           |                                                                                                                                                                                                          |                                                                                                                                                                                                                                                                         |                                                                         | Case report - conference abstract | Very low |  |  |  |
| 56                                                                                                      | Biological and analytical assessment of e-cigarette aerosol components on airway epithelia. Singh J., Luquet E., Smith D.P.T., Pappas H.J., Pappas F. Embase Classic-Embase. Science progress. 99(4) (p 351-368). 2018. Date of Publication: 01 Dec 2018. [Review] AN: 62194494                                                                                                                               | In-vitro, tested 18 different e-cigarette refill flavours for their toxicity on human derived bronchial cells (Beas2B)                                                                                                                                                                                                                                                              | tested 18 different e-cigarette refill flavours for their toxicity on human derived bronchial cells (Beas2B)                                                                                                                            |                                                                                                                                                                                                                                        |                                                                                                                                                                                                                                                                                                                                                                                                                                                                                                                                                                                                                                                                                                                                                                                                                                                                                                                                                                                                                              |                                                                                                                                                                                                                                                                                                                                                                                                                                                                                                                                                                                                                                                                                                                                                                         |                                                                                                                                                                                                                                                                                                                                                                                                                                                                                                                                                                                                   |                                                                                                                                                                                                                                                                                                                                                           |                                                                                                                                                                                                          |                                                                                                                                                                                                                                                                         |                                                                         | Review Article                    | low      |  |  |  |



|    |                                                                                                                                                                                                                                                                                                                                                                                                                                                                                                                                                                                                                                                                                      |                                                                                                                                                                                                                                                                                                                                                                                                                                                                                                                                                                                                                                                                                                                                                                                                                                                             |                                                                                                                                                                                                                                                                                                                                                                                                                                                                                                                                                                                                                                                                                                                                                                                               |                                                                                                                                                                                                                                           |                                                            |                                                                                                                                                                                                                             |                                                                                                                                                                                                                                                                                                                                                                                                |                                                                                                                                                                                                                                                                                                                                                                                                                                                                                                                   |                                                                                                                                                                                                |            |                                                                                                                                         |                                        |                                   |          |
|----|--------------------------------------------------------------------------------------------------------------------------------------------------------------------------------------------------------------------------------------------------------------------------------------------------------------------------------------------------------------------------------------------------------------------------------------------------------------------------------------------------------------------------------------------------------------------------------------------------------------------------------------------------------------------------------------|-------------------------------------------------------------------------------------------------------------------------------------------------------------------------------------------------------------------------------------------------------------------------------------------------------------------------------------------------------------------------------------------------------------------------------------------------------------------------------------------------------------------------------------------------------------------------------------------------------------------------------------------------------------------------------------------------------------------------------------------------------------------------------------------------------------------------------------------------------------|-----------------------------------------------------------------------------------------------------------------------------------------------------------------------------------------------------------------------------------------------------------------------------------------------------------------------------------------------------------------------------------------------------------------------------------------------------------------------------------------------------------------------------------------------------------------------------------------------------------------------------------------------------------------------------------------------------------------------------------------------------------------------------------------------|-------------------------------------------------------------------------------------------------------------------------------------------------------------------------------------------------------------------------------------------|------------------------------------------------------------|-----------------------------------------------------------------------------------------------------------------------------------------------------------------------------------------------------------------------------|------------------------------------------------------------------------------------------------------------------------------------------------------------------------------------------------------------------------------------------------------------------------------------------------------------------------------------------------------------------------------------------------|-------------------------------------------------------------------------------------------------------------------------------------------------------------------------------------------------------------------------------------------------------------------------------------------------------------------------------------------------------------------------------------------------------------------------------------------------------------------------------------------------------------------|------------------------------------------------------------------------------------------------------------------------------------------------------------------------------------------------|------------|-----------------------------------------------------------------------------------------------------------------------------------------|----------------------------------------|-----------------------------------|----------|
| 58 | Vaping and tension pneumothorax: A retrospective association. Lo T. Embase Classic+Embase American Journal of Respiratory and Critical Care Medicine. Conference: American Thoracic Society International Conference. ATS 2017. United States. 105 (no pagination). 2017. Date of Publication: 2017. [Abstract] AN: 61772363                                                                                                                                                                                                                                                                                                                                                         | 21-year-old male                                                                                                                                                                                                                                                                                                                                                                                                                                                                                                                                                                                                                                                                                                                                                                                                                                            | daily cigarette use for the past 4-5 years, but switched to vaping over the last 7 months. He uses the Valsalva maneuver several times while vaping, including 2-3 times the night prior to admission                                                                                                                                                                                                                                                                                                                                                                                                                                                                                                                                                                                         | sudden onset of sharp intense right-sided, pleuritic chest pain and shortness of breath, which were both worse in a supine position. The symptoms started after he has been lifting tables at his workplace.                              | Tension Pneumothorax                                       | chest X-ray revealed a large right-sided tension pneumothorax. Computerized Tomography (CT) scan of the chest showed the presence of blebs bilaterally in the apices with the right lung affected much worse than the left. | Thoracic vent catheter was inserted and connected to the water suction device. Did not resolve. Right video-assisted thoracoscopic with a thoracoscopic wedge resection of the right apical blebs, complete thoracoscopic pleuroctomy, and talc pleurodesis were performed with resolution of the pneumothorax.                                                                                | Discharged three days after VATS                                                                                                                                                                                                                                                                                                                                                                                                                                                                                  | none                                                                                                                                                                                           |            |                                                                                                                                         | Case report - conference abstract      | low                               |          |
| 59 | Antenatal exposure to e-cigarettes (vapor) as a possible etiology to fetal colonic necrotizing enterocolitis: A case report. Gilen S, Saltzman D. Embase Classic+Embase Journal of Pediatric Surgery Case Reports. 2 (12) (pp 538-537). 2015. Date of Publication: January 2015. [Article] AN: 60273352                                                                                                                                                                                                                                                                                                                                                                              | 1-day-old infant male                                                                                                                                                                                                                                                                                                                                                                                                                                                                                                                                                                                                                                                                                                                                                                                                                                       | mother had been consistently smoking an e-cigarette throughout the pregnancy—from 30 to 30 times per day. In addition, during the time of active labor, she smoked the e-cigarette approximately 50-70 times.                                                                                                                                                                                                                                                                                                                                                                                                                                                                                                                                                                                 | vapor of e-cigarette liquid with or without nicotine, vapor of the carrier substances propylene glycol and glycerol as well as to mainstream smoke of KRRAF research cigarettes                                                           | colonic necrotizing enterocolitis                          | pneumonia intestinalis                                                                                                                                                                                                      |                                                                                                                                                                                                                                                                                                                                                                                                |                                                                                                                                                                                                                                                                                                                                                                                                                                                                                                                   | Infant currently doing "extremely well". This is growing appropriately and meeting his developmental milestones during his last check at 9 months of age.                                      | six months | infant required mechanical ventilation and pressure support thus he was taken to the operating room for emergent abdominal exploration. | Case Report                            | very low                          |          |
| 60 | Evaluation of e-cigarette liquid vapor and mainstream cigarette smoke after direct exposure of primary human bronchial epithelial cells. Schaefer S, Dehan H, Kruschewski D, Forstner C, Brandstedt D, Aufderheide M. Embase Classic+Embase International Journal of Environmental Research and Public Health. 12 (4) (pp 3815-3820). 2015. Date of Publication: 08 Apr 2015. [Article] AN: 60262194                                                                                                                                                                                                                                                                                 |                                                                                                                                                                                                                                                                                                                                                                                                                                                                                                                                                                                                                                                                                                                                                                                                                                                             |                                                                                                                                                                                                                                                                                                                                                                                                                                                                                                                                                                                                                                                                                                                                                                                               |                                                                                                                                                                                                                                           |                                                            |                                                                                                                                                                                                                             |                                                                                                                                                                                                                                                                                                                                                                                                | We found toxicological effects of e-cigarette vapor and the pure carrier substances, whereas the nicotine concentration did not have an effect on the cell viability. The viability of mainstream smoke cigarette exposed cells was 4.58 times lower and the oxidative stress levels 4.55 times higher than those of e-cigarette vapor exposed cells, depending on the donor.                                                                                                                                     |                                                                                                                                                                                                |            | Journal Article                                                                                                                         | very low                               |                                   |          |
| 61 | Not only smoking is deadly: fatal ingestion of e-juice-a case report. Barakat S, Meron-Chazotte B, Bendor K, Balke J, Rothchild M.A, Jubner M. Embase Classic+Embase International Journal of Legal Medicine. 129 (3) (pp 481-480). 2015. Date of Publication: 01 May 2015. [Article] AN: 60815006                                                                                                                                                                                                                                                                                                                                                                                   | 34-year-old man                                                                                                                                                                                                                                                                                                                                                                                                                                                                                                                                                                                                                                                                                                                                                                                                                                             | psychosis.                                                                                                                                                                                                                                                                                                                                                                                                                                                                                                                                                                                                                                                                                                                                                                                    | DIY NOT VAPE. Ingested three nicotine solution vials of the brand "Titanium Ice" (of 90 mL each).                                                                                                                                         | Found deceased after ingestion of nicotine.                |                                                                                                                                                                                                                             |                                                                                                                                                                                                                                                                                                                                                                                                |                                                                                                                                                                                                                                                                                                                                                                                                                                                                                                                   | Decreased after ingestion                                                                                                                                                                      |            |                                                                                                                                         | Case Report                            | Very low                          |          |
| 62 | Efficacy and safety of electronic cigarettes for smoking cessation: A systematic review. Alahab R.C., Khan M., Stanbrook M.B. Embase Classic+Embase American Journal of Respiratory and Critical Care Medicine. Conference: American Thoracic Society International Conference. ATS 2015. Denver, CO United States. Conference Publication: (see pagings). 101 (Meeting/abstracts) (no pagination). 2015. Date of Publication: 2015. [Conference Abstract] AN: 60262194                                                                                                                                                                                                              | Systematic review 1986 to May 2014. 4601 abstracts identified. 297 articles underwent full-text review                                                                                                                                                                                                                                                                                                                                                                                                                                                                                                                                                                                                                                                                                                                                                      | Meta-analysis. Multiple types                                                                                                                                                                                                                                                                                                                                                                                                                                                                                                                                                                                                                                                                                                                                                                 |                                                                                                                                                                                                                                           |                                                            |                                                                                                                                                                                                                             |                                                                                                                                                                                                                                                                                                                                                                                                | Meta-analysis showed that point prevalence abstinence was significantly better for e-cigarettes vs placebo at 1 month (RR 1.71, 95% CI 1.08-2.72, I <sup>2</sup> =0%). However, differences for point prevalence abstinence did not reach statistical significance at 3 months (RR 1.65, 95% CI 0.76-3.13, I <sup>2</sup> =65%) or 6 months (RR 1.32, 95% CI 0.59-2.93, I <sup>2</sup> =65%), with large heterogeneity between studies regarding the validity of these pooled estimates. Estimated after 24hours. |                                                                                                                                                                                                |            |                                                                                                                                         | Review Article                         | low                               |          |
| 63 | Complications secondary to electronic cigarette use. Frouzakis S, M., Valsanyi P.M., Endre-Bryas A.S. Embase Classic+Embase American Journal of Respiratory and Critical Care Medicine. Conference: American Thoracic Society International Conference. ATS 2015. Denver, CO United States. Conference Publication: (see pagings). 101 (Meeting/abstracts) (no pagination). 2015. Date of Publication: 2015. [Conference Abstract] AN: 72145143                                                                                                                                                                                                                                      | 30-year-old Caucasian man with 10-pack-year smoking history                                                                                                                                                                                                                                                                                                                                                                                                                                                                                                                                                                                                                                                                                                                                                                                                 | started using EC two days prior to symptom onset                                                                                                                                                                                                                                                                                                                                                                                                                                                                                                                                                                                                                                                                                                                                              | acute onset dyspnea.                                                                                                                                                                                                                      | moderate axilla and edema of the para-tracheal musculature |                                                                                                                                                                                                                             |                                                                                                                                                                                                                                                                                                                                                                                                |                                                                                                                                                                                                                                                                                                                                                                                                                                                                                                                   | Despite intravenous administration of diphtheria, tetanus, and pertussis antigens, patients' dyspnea worsened.                                                                                 |            |                                                                                                                                         | Intubation with mechanical ventilation | Case report - conference abstract | low      |
| 64 | Metastatic foreign material deposits and alveolar hemorrhage in crack cocaine smoker. Sogomonian R, Gandhi V., McGerty T, Mezzalana M. Embase Classic+Embase Journal of Investigative Medicine. Conference: 2015 Combined Annual Meeting of the Central Society for Clinical and Translational Research and the Midwestern Section American Federation for Medical Research. Chicago, IL, United States. Conference Publication: (see pagings). 53 (4) (pp 495). 2015. Date of Publication: April 2015. [Conference Abstract] AN: 71918847                                                                                                                                           | 50-year-old African-American female prisoner of crack cocaine                                                                                                                                                                                                                                                                                                                                                                                                                                                                                                                                                                                                                                                                                                                                                                                               | DIY NOT VAPE                                                                                                                                                                                                                                                                                                                                                                                                                                                                                                                                                                                                                                                                                                                                                                                  | acute onset of subjective fever, shortness of breath and cough productive of blood-streaked sputum                                                                                                                                        | DAH                                                        | Crack Cocaine including binge crack inhalation 2 days prior                                                                                                                                                                 | extensive right upper lobe consolidation, nodular ground-glass infiltrate and a similar but less severe process in the right lower lobe                                                                                                                                                                                                                                                        | diffuse edema of the airways without active hemorrhage. Bronchoalveolar lavage (BAL) fluid samples were non-hemorrhagic. Transbronchial biopsy demonstrated alveolar hemorrhage with refractile foreign material deposits.                                                                                                                                                                                                                                                                                        | No evidence of pneumococci. Microbiologic evaluation, including routine cultures, legumins and histoplasma urine antigens, as well as sputum mycobacterial smears, were clinically negative.   |            |                                                                                                                                         |                                        | Case report - conference abstract | very low |
| 65 | Vaping-Associated Lung Injury. Island JM, Arent SW, Ovid MEDLINE(R) ALL American Journal of Clinical Pathology. 2019 Oct 25. [Journal Article] UI: 31652023                                                                                                                                                                                                                                                                                                                                                                                                                                                                                                                          | Case series, 17 patients                                                                                                                                                                                                                                                                                                                                                                                                                                                                                                                                                                                                                                                                                                                                                                                                                                    | Island JM, Arent SW, Ovid MEDLINE(R) ALL American Journal of Clinical Pathology. 2019 Oct 25. [Journal Article] UI: 31652023                                                                                                                                                                                                                                                                                                                                                                                                                                                                                                                                                                                                                                                                  | Organizing pneumonia, DAH, and Acute fibrinous pneumonitis with organization                                                                                                                                                              | bilateral pulmonary opacities.                             | Two cases, bronchoalveolar lavage fluid was available and contained abundant foamy macrophages                                                                                                                              | In all cases, histopathological findings showed patterns of acute lung injury including acute fibrinous pneumonitis, diffuse alveolar damage, or organizing pneumonia, usually bronchioalveolar and accompanied by bronchiolitis. No histologic findings were specific, but foamy macrophages and pneumocyte vacuolization were seen in all cases and may be useful diagnostic clues in        | glucocorticoids and maximum supportive care                                                                                                                                                                                                                                                                                                                                                                                                                                                                       | Despite treatment with glucocorticoids and maximum supportive care, no patients with diffuse alveolar damage died. Remainder survived.                                                         |            |                                                                                                                                         | Correspondence                         | High                              |          |
| 66 | Legal products containing THC are banned for vaping lung disease in Utah. Tenen JL, Ovid MEDLINE(R) ALL BMJ. 367:k216. 2019 Oct 25. [Letter] UI: 31650940                                                                                                                                                                                                                                                                                                                                                                                                                                                                                                                            | Could not access article                                                                                                                                                                                                                                                                                                                                                                                                                                                                                                                                                                                                                                                                                                                                                                                                                                    |                                                                                                                                                                                                                                                                                                                                                                                                                                                                                                                                                                                                                                                                                                                                                                                               |                                                                                                                                                                                                                                           |                                                            |                                                                                                                                                                                                                             |                                                                                                                                                                                                                                                                                                                                                                                                |                                                                                                                                                                                                                                                                                                                                                                                                                                                                                                                   |                                                                                                                                                                                                |            |                                                                                                                                         |                                        | Correspondence                    | Medium   |
| 67 | E-cigarettes and Vaping Implicated in Recent Cases of Severe Lung Disease. Pritsker C, Ovid MEDLINE(R) ALL American Journal of Nursing. 119(11):12. 2019 Nov. [Journal Article] UI: 31651460                                                                                                                                                                                                                                                                                                                                                                                                                                                                                         | One page summary of case report. No new information or primary research                                                                                                                                                                                                                                                                                                                                                                                                                                                                                                                                                                                                                                                                                                                                                                                     |                                                                                                                                                                                                                                                                                                                                                                                                                                                                                                                                                                                                                                                                                                                                                                                               |                                                                                                                                                                                                                                           |                                                            |                                                                                                                                                                                                                             |                                                                                                                                                                                                                                                                                                                                                                                                |                                                                                                                                                                                                                                                                                                                                                                                                                                                                                                                   |                                                                                                                                                                                                |            |                                                                                                                                         |                                        | Journal Article                   | low      |
| 68 | E-cigarette Use, or Vaping, Practices and Associated Lung Injury - Utah, April-October 2019. Lewis N, McCaffrey K, Sage K, Cheng C, Green J, Goldstein L, Campbell H, Ferris D, Mosen N, LeCron N, Mastrototaro A, Beard A, Hancock A, Harris D, Callahan S, Aberg S, Risk E, Willardson S, Cotter A, Nalsettian D, Dunne J, Burnett C, Atkinson R, Dunn A. Ovid MEDLINE(R) ALL MMWR. Morbidity & Mortality Weekly Report. 68(42):953-956. 2019 Oct 25. [Journal Article] UI: 31647788                                                                                                                                                                                               | Analysis of medical records of 79 of 83 vaping cases in Utah. Among 53 interviewed patients, all of whom reported using e-cigarettes or vaping products within 3 months of acute lung injury, group (n=53) 14-19 (41%) reported using any products containing tetrahydrocannabinol (THC), the principal psychoactive component of cannabis. 35 (66%) reported using any nicotine-containing products, and 32 (60%) reported using both, most THC-containing products were acquired from informal sources such as friends or illicit in-person and online dealers. THC-containing products were most commonly used one to five times per day, whereas nicotine-containing products were most commonly used >25 times per day. Product sample testing at the Utah Public Health Laboratory (UPHL) showed evidence of vitamin E acetate in 17 of 20 (85%) THC- | Among 53 interviewed patients, all of whom reported using e-cigarettes or vaping products within 3 months of acute lung injury, group (n=53) 14-19 (41%) reported using any products containing tetrahydrocannabinol (THC), the principal psychoactive component of cannabis. 35 (66%) reported using any nicotine-containing products, and 32 (60%) reported using both, most THC-containing products were acquired from informal sources such as friends or illicit in-person and online dealers. THC-containing products were most commonly used one to five times per day, whereas nicotine-containing products were most commonly used >25 times per day. Product sample testing at the Utah Public Health Laboratory (UPHL) showed evidence of vitamin E acetate in 17 of 20 (85%) THC- | Not listed                                                                                                                                                                                                                                | Not listed                                                 |                                                                                                                                                                                                                             |                                                                                                                                                                                                                                                                                                                                                                                                | Treated with steroids 59 (73%)                                                                                                                                                                                                                                                                                                                                                                                                                                                                                    | Hospitalization 70 (89%), ICU admission 35 (44%), CPAP/BIPAP support (No intubation) 30 (38%), Intubation and mechanical ventilation 9 (11%)                                                   |            |                                                                                                                                         | Journal Article                        | medium                            |          |
| 69 | Update: Interim Guidance for Health Care Providers Evaluating and Caring for Patients with Suspected E-cigarette, or Vaping, Product Use Associated Lung Injury - United States, October 2019. Siegel DA, Jellison TC, Korman EH, Korman EA, Lauer M, Cohen JE, Kimball A, Weisman DN, Peterson EE, Reagan-Stevens S, Gofford Cole S, Moulia D, Moritz E, Lehnerst JD, Michie J, Landon J, Zhai SR, King BA, Jones CM, Patel A, Daltman DM, Koppala R. Lung Injury Response Clinical Working Group. Lung Injury Response Epidemiology/Surveillance Group. Ovid MEDLINE(R) ALL MMWR. Morbidity & Mortality Weekly Report. 68(41):919-927. 2019 Oct 15. [Journal Article] UI: 31647788 | No additional cases. Report provides guidance for 1) initial clinical evaluation; 2) suggested criteria for hospital admission and treatment; 3) patient follow-up; 4) special considerations for groups at high risk; and 5) clinical and public health recommendations.                                                                                                                                                                                                                                                                                                                                                                                                                                                                                                                                                                                   |                                                                                                                                                                                                                                                                                                                                                                                                                                                                                                                                                                                                                                                                                                                                                                                               |                                                                                                                                                                                                                                           |                                                            |                                                                                                                                                                                                                             |                                                                                                                                                                                                                                                                                                                                                                                                |                                                                                                                                                                                                                                                                                                                                                                                                                                                                                                                   |                                                                                                                                                                                                |            |                                                                                                                                         |                                        | CDC report                        | Medium   |
| 70 | Vaping-Associated Acute Lung Injury - Case Series. Triantafyllou GA, Tibero PJ, Zou RH, Lambert PE, Lyon MA, West JW, Gaudin MF, Morris A, Chazotte B. American Journal of Respiratory and Critical Care Medicine. 2019 Oct 01. [Journal Article] UI: 31574220                                                                                                                                                                                                                                                                                                                                                                                                                       | 6 young men                                                                                                                                                                                                                                                                                                                                                                                                                                                                                                                                                                                                                                                                                                                                                                                                                                                 | All patients reported regular use of flavored cannabis and nicotine products, and the most recent exposure ranged between three and nine days prior to presentation. Four patients used the same type of cannabis solution. Most common used cannabis product was "Dank Vape"                                                                                                                                                                                                                                                                                                                                                                                                                                                                                                                 | fever (median temperature 39.2, interquartile range (IQR)= 0.65 °C) and a variety of respiratory and gastrointestinal symptoms, including dyspnea, non-productive cough, chest and abdominal pain, nausea, vomiting, and watery diarrhea. | Not Defined. No biopsy.                                    | Computed tomography (CT) scans revealed multi-lobar ground glass opacities with subpleural sparing.                                                                                                                         | Two patients underwent bronchoscopy with bronchoalveolar lavage (BAL). Microbial cultures were negative in the BAL. Cell count showed 280 white blood cells/mm <sup>3</sup> (differential: 15% neutrophils, 31% lymphocytes, 2% eosinophils, 51% monocytes) on the first patient and 380 white blood cells/mm <sup>3</sup> (differential: 11% neutrophils, 8% lymphocytes, 0% eosinophils, 69% | antimicrobial therapy                                                                                                                                                                                                                                                                                                                                                                                                                                                                                             | Median duration of symptoms was 4.5 (IQR=3-5) days, median length of stay in the hospital was 8 (IQR=5-5) days, median length of stay in the ICU was 2 (IQR=1-2) days. No fatalities occurred. |            | two required mechanical ventilation (the first patient was successfully extubated after one day; the second one after 5 days)           | Journal Article                        | High                              |          |
| 71 | Recurrent spontaneous pneumothoraces and vaping in an 18-year-old man: a case report and review of the literature. Benita A, Bar A, Al. Alami BM, Ward RA, Fattouh MB, Dabou RA, Karagayrak T, Johnson AL, Foch EE, Vias JM. Journal of Medical Case Reports [Electronic Resource]. 13(1):283. 2019 Sep 09. [Journal Article]                                                                                                                                                                                                                                                                                                                                                        | 18-year-old Caucasian man                                                                                                                                                                                                                                                                                                                                                                                                                                                                                                                                                                                                                                                                                                                                                                                                                                   | reported a history of vaping just prior to both episodes                                                                                                                                                                                                                                                                                                                                                                                                                                                                                                                                                                                                                                                                                                                                      | presented twice with recurrent right-sided spontaneous pneumothoraces within 2 weeks                                                                                                                                                      | Pneumothorax                                               | right-sided spontaneous pneumothorax on chest X-ray and computed tomography scan                                                                                                                                            |                                                                                                                                                                                                                                                                                                                                                                                                |                                                                                                                                                                                                                                                                                                                                                                                                                                                                                                                   | Improved                                                                                                                                                                                       | no weeks   |                                                                                                                                         |                                        | Case Report                       | medium   |
| 72 | ATS Health Alert: Vaping-associated Pulmonary Illness (VAPI). Carter W. C., Cray, Alexander L.E., Gross J.E., Diaz Cruz C.S., Keller J.M., Patrick S., Jerni S. Embase Classic+Embase American Journal of Respiratory and Critical Care Medicine. 200 (7) (pp 1157-1160). 2019. Date of Publication: 01 Oct 2019. [Article] AN: 60262338 PMID: 31552098 <a href="https://www.ncbi.nlm.nih.gov/pubmed/31552098">https://www.ncbi.nlm.nih.gov/pubmed/31552098</a>                                                                                                                                                                                                                      | Patent information. No cases                                                                                                                                                                                                                                                                                                                                                                                                                                                                                                                                                                                                                                                                                                                                                                                                                                |                                                                                                                                                                                                                                                                                                                                                                                                                                                                                                                                                                                                                                                                                                                                                                                               |                                                                                                                                                                                                                                           |                                                            |                                                                                                                                                                                                                             |                                                                                                                                                                                                                                                                                                                                                                                                |                                                                                                                                                                                                                                                                                                                                                                                                                                                                                                                   |                                                                                                                                                                                                |            |                                                                                                                                         |                                        | Journal Article                   | Low      |
| 73 | Vaping-related lung illnesses: time to act. The Lancet Oncology Embase Classic+Embase The Lancet Oncology. 20 (10) (pp 1327). 2019. Date of Publication: October 2019. [Editorial] AN: 202286974                                                                                                                                                                                                                                                                                                                                                                                                                                                                                     | Editorial on Wisconsin and Illinois cluster. No new cases                                                                                                                                                                                                                                                                                                                                                                                                                                                                                                                                                                                                                                                                                                                                                                                                   |                                                                                                                                                                                                                                                                                                                                                                                                                                                                                                                                                                                                                                                                                                                                                                                               |                                                                                                                                                                                                                                           |                                                            |                                                                                                                                                                                                                             |                                                                                                                                                                                                                                                                                                                                                                                                |                                                                                                                                                                                                                                                                                                                                                                                                                                                                                                                   |                                                                                                                                                                                                |            |                                                                                                                                         |                                        | Editorial                         | Low      |
| 74 | Real-Time Digital Surveillance of Vaping-Induced Pulmonary Disease. Hsiao Y, Brownstein JS. Embase Classic+Embase The New England Journal of Medicine. (no pagination). 2019. Date of Publication: 20 Sep 2019. [Letter] AN: 60380150 PMID: 31539466 <a href="https://www.ncbi.nlm.nih.gov/pubmed/31539466">https://www.ncbi.nlm.nih.gov/pubmed/31539466</a>                                                                                                                                                                                                                                                                                                                         | Correspondence on real-time surveillance and monitoring of outbreak. No new cases                                                                                                                                                                                                                                                                                                                                                                                                                                                                                                                                                                                                                                                                                                                                                                           |                                                                                                                                                                                                                                                                                                                                                                                                                                                                                                                                                                                                                                                                                                                                                                                               |                                                                                                                                                                                                                                           |                                                            |                                                                                                                                                                                                                             |                                                                                                                                                                                                                                                                                                                                                                                                |                                                                                                                                                                                                                                                                                                                                                                                                                                                                                                                   |                                                                                                                                                                                                |            |                                                                                                                                         |                                        | Correspondence                    | Low      |
| 75 | Outbreak of pulmonary diseases linked to vaping. Hammond D. Embase Classic+Embase The BMJ. 360 (no pagination). 2019. Article Number: 3440. Date of Publication: 10 Sep 2019. [Editorial] AN: 620292824 PMID: 31502254 <a href="https://www.ncbi.nlm.nih.gov/pubmed/31502254">https://www.ncbi.nlm.nih.gov/pubmed/31502254</a>                                                                                                                                                                                                                                                                                                                                                       | Editorial. No new cases.                                                                                                                                                                                                                                                                                                                                                                                                                                                                                                                                                                                                                                                                                                                                                                                                                                    |                                                                                                                                                                                                                                                                                                                                                                                                                                                                                                                                                                                                                                                                                                                                                                                               |                                                                                                                                                                                                                                           |                                                            |                                                                                                                                                                                                                             |                                                                                                                                                                                                                                                                                                                                                                                                |                                                                                                                                                                                                                                                                                                                                                                                                                                                                                                                   |                                                                                                                                                                                                |            |                                                                                                                                         |                                        | Correspondence                    | Low      |
